# Supplementary material for: EGF-Coupled Gold Nanoparticles Increase the Expression of CNPase and the Myelin-Associated Proteins MAG, MOG, and MBP in the Septal Nucleus Demyelinated by Cuprizone
Source: MDPI journal article supplement (doi:10.3390/life12030333), 2022-02-23
Supplement: s1 [file s1]

Supplementary

# EGF-Coupled Gold Nanoparticles Increase the Expression of CNPase and the Myelin-Associated Proteins MAG, MOG, and MBP in the Septal Nucleus Demyelinated by Cuprizone

Eduardo Lira-Díaz <sup>1,2</sup>, Jesús Monroy-Rodríguez <sup>3</sup>, María G. González-Pedroza <sup>4</sup>, Raul A. Morales-Luckie <sup>5</sup>, Luis Castro-Sánchez <sup>3,6</sup> and Oscar González-Pérez <sup>1,\*</sup>

<sup>1</sup> Laboratory of Neuroscience, School of Psychology, University of Colima, Colima 28040, Mexico; elira@ucol.mx and osglez@ucol.mx

<sup>2</sup> Physiological Science PhD Program, School of Medicine, University of Colima, Colima 28040, Mexico

<sup>3</sup> University Center for Biomedical Research, University of Colima, Colima 28045, Mexico; jmonroy@ucol.mx (J.M.-R.); luis\_castro@ucol.mx (L.C.-S.)

<sup>4</sup> Department of Biotechnology, School of Sciences, Autonomous University of the State of Mexico, Toluca 50200, Mexico; mggonzalezp@uaemex.mx

<sup>5</sup> Department of Nanomaterials, Joint Center for Research in Sustainable Chemistry UAEMex—UNAM (CCIQS), Autonomous University of the State of Mexico (UAEMex), Toluca 50200, Mexico rmorales@uaemex.mx

<sup>6</sup> CONACyT-University of Colima, Colima 28045, Mexico

\* Correspondence: osglez@ucol.mx

**Table S1.** Descriptive statistics for rotarod, latency to fall.

| 8 rpm    |                     | 15 rpm   |                     |
|----------|---------------------|----------|---------------------|
| Group    | Mean ± SE (seconds) | Group    | Mean ± SE (seconds) |
| Ctrl     | 60 ± 0              | Ctrl     | 60 ± 0              |
| CPZ      | 60 ± 0              | CPZ      | 54 ± 2.94           |
| GNPs     | 60 ± 0              | GNPs     | 56.43 ± 3.14        |
| EGF      | 60 ± 0              | EGF      | 51.75 ± 6.09        |
| EGF-GNPs | 58.06 ± 1.93        | EGF-GNPs | 57.87 ± 1.91        |
| 30 rpm   |                     | 35 rpm   |                     |
| Group    | Mean ± SE (seconds) | Group    | Mean ± SE (seconds) |
| Ctrl     | 54.9 ± 3.25         | Ctrl     | 50.6 ± 4.23         |
| CPZ      | 31.83 ± 5.12        | CPZ      | 20.20 ± 5.68        |
| GNPs     | 46 ± 5.36           | GNPs     | 38.75 ± 7.70        |
| EGF      | 33.87 ± 6.75        | EGF      | 24.06 ± 6.30        |
| EGF-GNPs | 45.37 ± 4.96        | EGF-GNPs | 40.5 ± 6.51         |

**Table S2.** Rotarod test performance, statistical analysis for 3 WPI, Kruskal-Wallis H test.

| Speed  | Kruskal-Wallis test |
|--------|---------------------|
| 8 rpm  | $H = 0.314$         |
| 15 rpm | $H = 0.137$         |
| 30 rpm | $H = 0.026^*$       |
| 35 rpm | $H = 0.006^*$       |

**Table S3.** Rotarod test performance, statistical analysis for 3 WPI, Bonferroni correction for pair comparison.

| Comparison | 30 rpm    | 35 rpm    |
|------------|-----------|-----------|
|            | $p$ value | $p$ value |

|                  |               |               |
|------------------|---------------|---------------|
| Ctrl vs CPZ      | $p = 0.003^*$ | $p = 0.001^*$ |
| Ctrl vs GNPs     | $p = 0.235$   | $p = 0.244$   |
| Ctrl vs EGF      | $p = 0.010^*$ | $p = 0.005^*$ |
| Ctrl vs EGF-GNPs | $p = 0.267$   | $p = 0.248$   |
| CPZ vs GNPs      | $p = 0.131$   | $p = 0.055$   |
| CPZ vs EGF       | $p = 0.934$   | $p = 0.840$   |
| CPZ vs EGF-GNPs  | $p = 0.111$   | $p = 0.053$   |
| GNPs vs EGF      | $p = 0.192$   | $p = 0.116$   |
| GNPs vs EGF-GNPs | $p = 0.940$   | $p = 0.993$   |
| EGF vs EGF-GNPs  | $p = 0.168$   | $p = 0.114$   |

Table S4. Descriptive statistics for Western blot.

| 2 weeks post-injection |                 | 3 weeks post-injection |                 |
|------------------------|-----------------|------------------------|-----------------|
| CNPase                 |                 | CNPase                 |                 |
| Group                  | Mean $\pm$ SE   | Group                  | Mean $\pm$ SE   |
| Ctrl                   | 1.00 $\pm$ 0.03 | Ctrl                   | 1.00 $\pm$ 0.04 |
| CPZ                    | 0.81 $\pm$ 0.12 | CPZ                    | 0.94 $\pm$ 0.15 |
| GNPs                   | 1.29 $\pm$ 0.20 | GNPs                   | 0.97 $\pm$ 0.22 |
| EGF                    | 0.99 $\pm$ 0.12 | EGF                    | 0.69 $\pm$ 0.12 |
| EGF-GNPs               | 1.26 $\pm$ 0.02 | EGF-GNPs               | 1.09 $\pm$ 0.09 |
| MAG                    |                 | MAG                    |                 |
| Group                  | Mean $\pm$ SE   | Group                  | Mean $\pm$ SE   |
| Ctrl                   | 1.00 $\pm$ 0.01 | Ctrl                   | 1.00 $\pm$ 0.06 |
| CPZ                    | 0.68 $\pm$ 0.19 | CPZ                    | 0.96 $\pm$ 0.06 |
| GNPs                   | 1.08 $\pm$ 0.19 | GNPs                   | 1.25 $\pm$ 0.15 |
| EGF                    | 0.82 $\pm$ 0.19 | EGF                    | 0.92 $\pm$ 0.13 |
| EGF-GNPs               | 1.16 $\pm$ 0.05 | EGF-GNPs               | 1.44 $\pm$ 0.06 |
| MOG                    |                 | MOG                    |                 |
| Group                  | Mean $\pm$ SE   | Group                  | Mean $\pm$ SE   |
| Ctrl                   | 1.00 $\pm$ 0.17 | Ctrl                   | 1.00 $\pm$ 0.02 |
| CPZ                    | 0.32 $\pm$ 0.08 | CPZ                    | 1.21 $\pm$ 0.28 |
| GNPs                   | 0.90 $\pm$ 0.35 | GNPs                   | 1.30 $\pm$ 0.55 |
| EGF                    | 0.74 $\pm$ 0.33 | EGF                    | 0.72 $\pm$ 0.23 |
| EGF-GNPs               | 0.95 $\pm$ 0.29 | EGF-GNPs               | 1.36 $\pm$ 0.14 |
| MBP                    |                 | MBP                    |                 |
| Group                  | Mean $\pm$ SE   | Group                  | Mean $\pm$ SE   |
| Ctrl                   | 1.00 $\pm$ 0.03 | Ctrl                   | 1.00 $\pm$ 0.09 |
| CPZ                    | 0.53 $\pm$ 0.32 | CPZ                    | 0.90 $\pm$ 0.27 |
| GNPs                   | 0.77 $\pm$ 0.31 | GNPs                   | 0.61 $\pm$ 0.08 |
| EGF                    | 0.53 $\pm$ 0.28 | EGF                    | 0.95 $\pm$ 0.23 |
| EGF-GNPs               | 0.86 $\pm$ 0.06 | EGF-GNPs               | 1.21 $\pm$ 0.26 |

Table S5. Myelin proteins, statistical analysis for 2 WPI and 3 WPI, Mann-Whitney U test.

| 2 WPI       | CNPase    |           | MAG       |           | MOG       |            | MBP       |           |
|-------------|-----------|-----------|-----------|-----------|-----------|------------|-----------|-----------|
| Comparison  | "U" value | p value   | "U" value | p value   | "U" value | p value    | "U" value | p value   |
| Ctrl vs CPZ | U = 3.000 | p = 0.513 | U = 2.000 | p = 0.275 | U = 0.000 | p = 0.050* | U = 3.000 | p = 0.513 |

|                   |                  |                |                  |                |                  |                |                  |                |
|-------------------|------------------|----------------|------------------|----------------|------------------|----------------|------------------|----------------|
| Ctrl vs GNP       | U = 2.000        | p = 0.275      | U = 3.000        | p = 0.513      | U = 4.000        | p = 0.827      | U = 3.000        | p = 0.513      |
| Ctrl vs EGF       | U = 3.000        | p = 0.513      |
| Ctrl vs EGF-GNP   | U = 0.000        | p = 0.050*     | U = 0.000        | p = 0.050*     | U = 4.000        | p = 0.827      | U = 1.000        | p = 0.127      |
| CPZ vs GNP        | U = 1.000        | p = 0.127      | U = 2.000        | p = 0.275      | U = 2.000        | p = 0.275      | U = 2.000        | p = 0.275      |
| CPZ vs EGF        | U = 2.000        | p = 0.275      | U = 3.000        | p = 0.513      | U = 2.000        | p = 0.275      | U = 4.000        | p = 0.827      |
| CPZ vs EGF-GNP    | U = 0.000        | p = 0.050*     | U = 0.000        | p = 0.050*     | U = 0.000        | p = 0.050*     | U = 3.000        | p = 0.513      |
| GNP vs EGF        | U = 2.000        | p = 0.275      | U = 3.000        | p = 0.513      | U = 4.000        | p = 0.827      | U = 2.000        | p = 0.275      |
| GNP vs EGF-GNP    | U = 3.000        | p = 0.513      | U = 3.000        | p = 0.513      | U = 4.000        | p = 0.827      | U = 3.000        | p = 0.513      |
| EGF vs EGF-GNP    | U = 0.000        | p = 0.050*     | U = 1.000        | p = 0.127      | U = 2.000        | p = 0.275      | U = 3.000        | p = 0.513      |
| <b>3 WPI</b>      |                  |                |                  |                |                  |                |                  |                |
| <b>CNPase</b>     |                  | <b>MAG</b>     |                  | <b>MOG</b>     |                  | <b>MBP</b>     |                  |                |
| <b>Comparison</b> | <b>"U" value</b> | <b>p value</b> |
| Ctrl vs CPZ       | U = 3.000        | p = 0.513      | U = 2.000        | p = 0.275      | U = 3.000        | p = 0.513      | U = 4.000        | p = 0.827      |
| Ctrl vs GNP       | U = 3.000        | p = 0.513      | U = 2.000        | p = 0.275      | U = 4.000        | p = 0.827      | U = 0.000        | p = 0.050*     |
| Ctrl vs EGF       | U = 1.000        | p = 0.127      | U = 2.000        | p = 0.275      | U = 3.000        | p = 0.513      | U = 4.000        | p = 0.827      |
| Ctrl vs EGF-GNP   | U = 3.000        | p = 0.513      | U = 0.000        | p = 0.050*     | U = 0.000        | p = 0.050*     | U = 4.000        | p = 0.827      |
| CPZ vs GNP        | U = 4.000        | p = 0.827      | U = 1.000        | p = 0.127      | U = 4.000        | p = 0.827      | U = 2.000        | p = 0.275      |
| CPZ vs EGF        | U = 2.000        | p = 0.275      | U = 4.000        | p = 0.827      | U = 1.000        | p = 0.127      | U = 4.000        | p = 0.827      |
| CPZ vs EGF-GNP    | U = 3.000        | p = 0.513      | U = 0.000        | p = 0.050*     | U = 4.000        | p = 0.827      | U = 2.000        | p = 0.275      |
| GNP vs EGF        | U = 3.000        | p = 0.513      | U = 0.000        | p = 0.050*     | U = 3.000        | p = 0.513      | U = 2.000        | p = 0.275      |
| GNP vs EGF-GNP    | U = 3.000        | p = 0.513      | U = 2.000        | p = 0.275      | U = 3.000        | p = 0.513      | U = 0.000        | p = 0.050*     |
| EGF vs EGF-GNP    | U = 1.000        | p = 0.127      | U = 0.000        | p = 0.050*     | U = 1.000        | p = 0.127      | U = 4.000        | p = 0.827      |

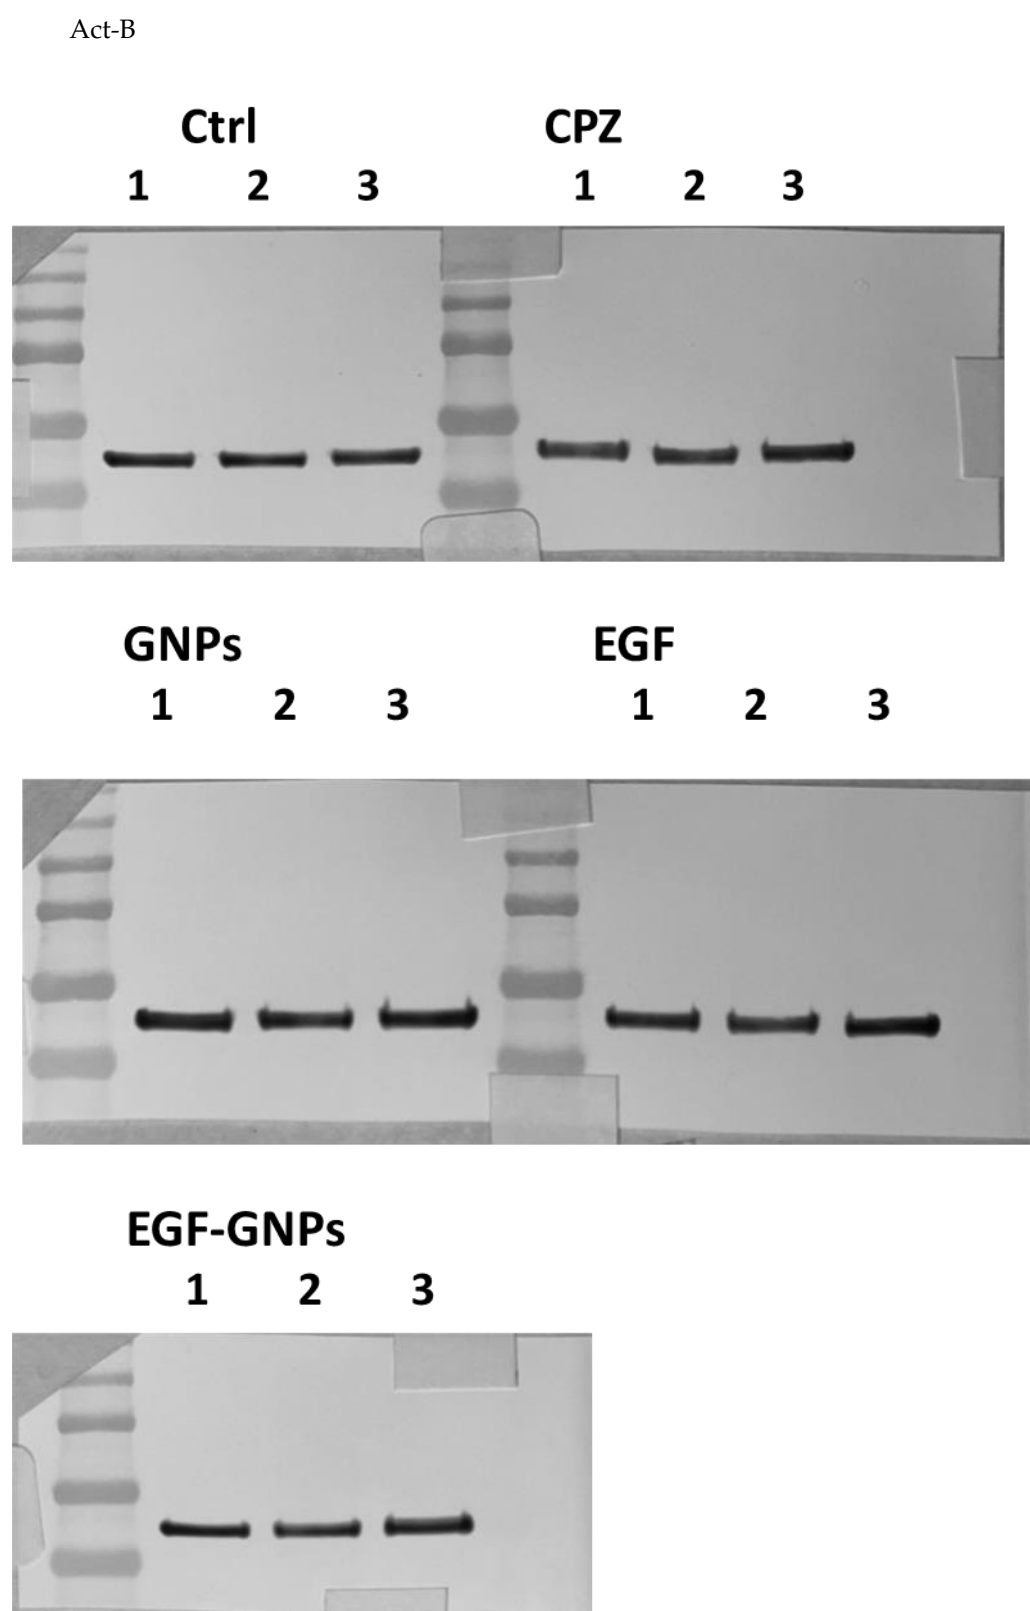

ACT-B: duplicates used as representative images in the main text

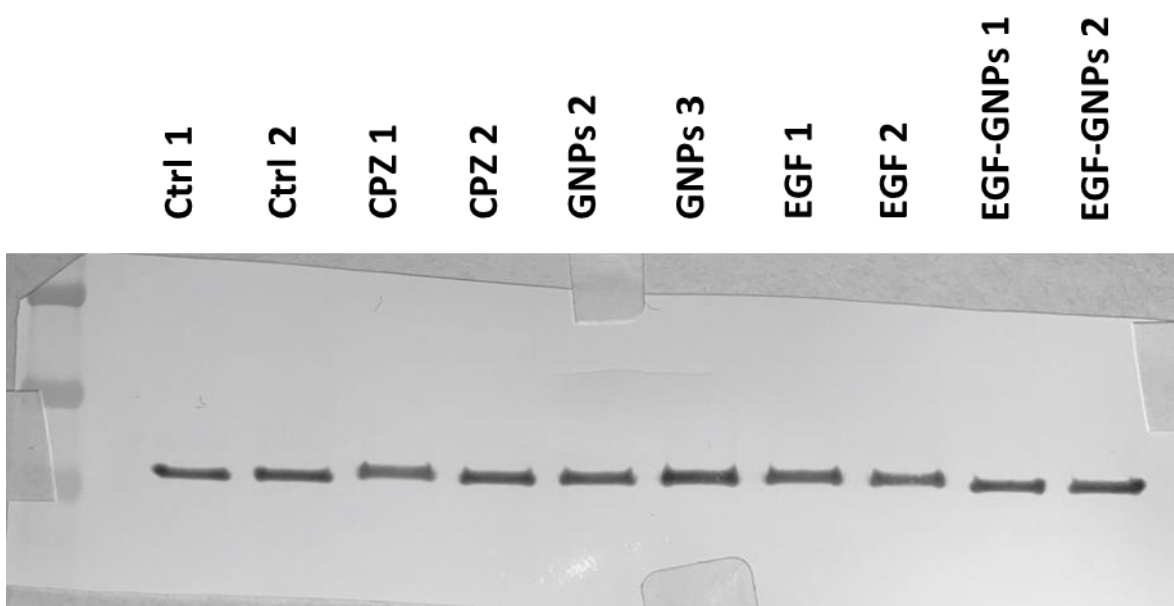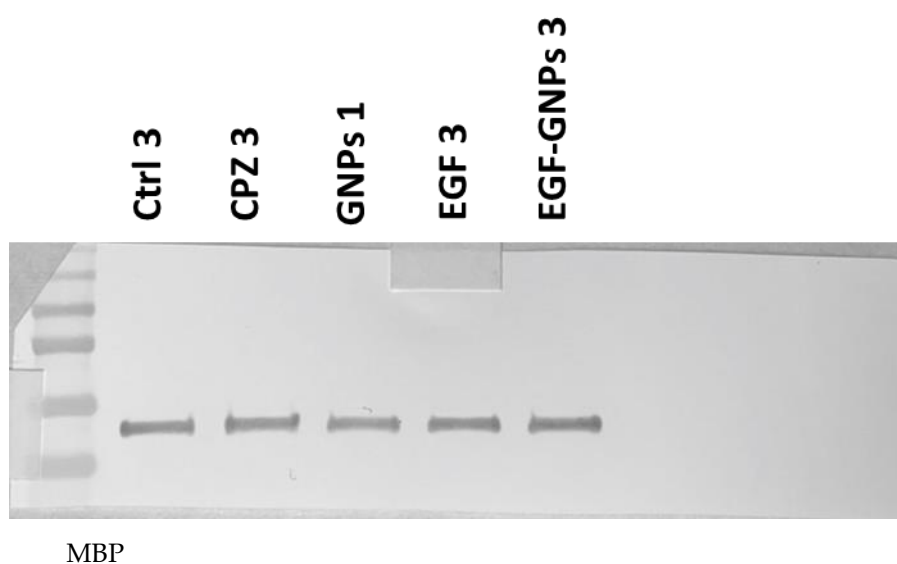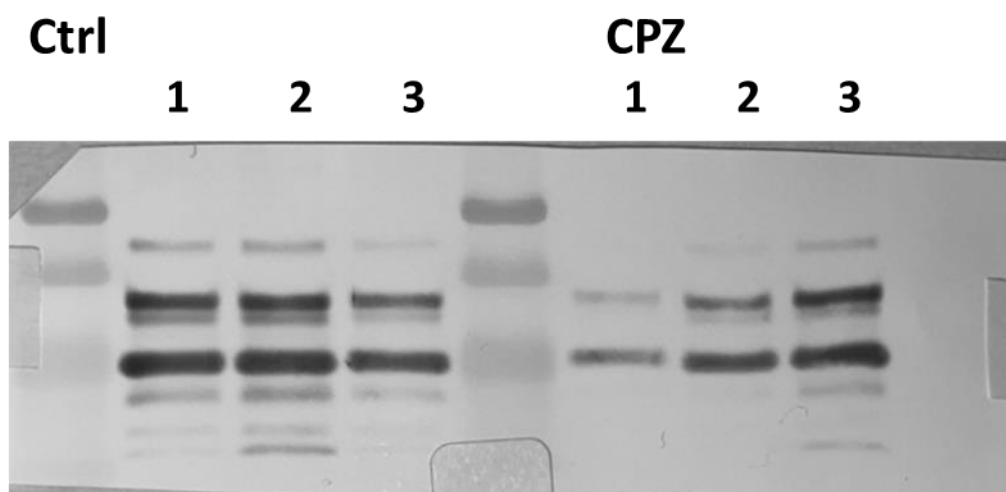

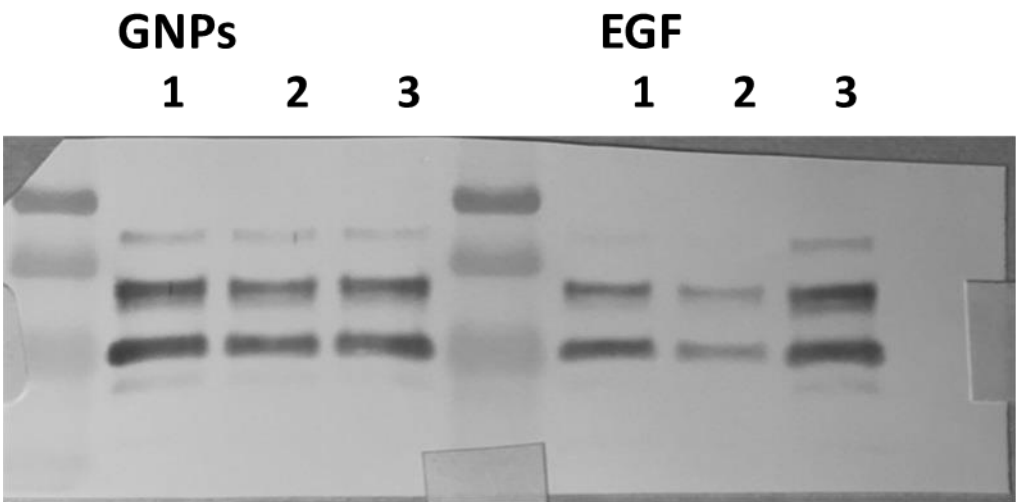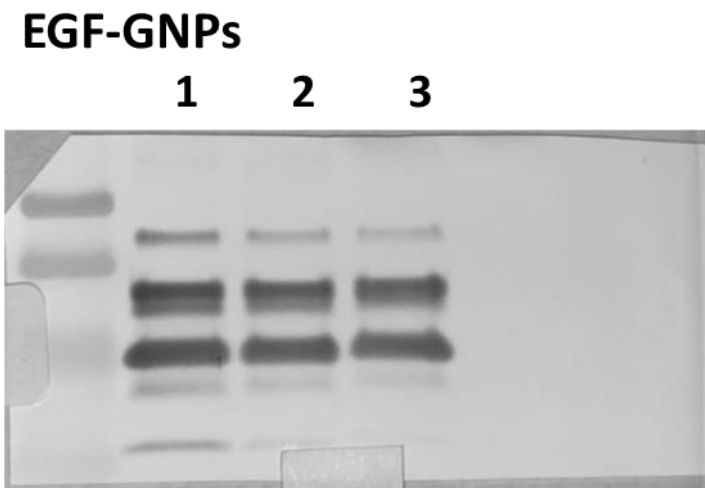

MBP: duplicates used as representative images in the main text

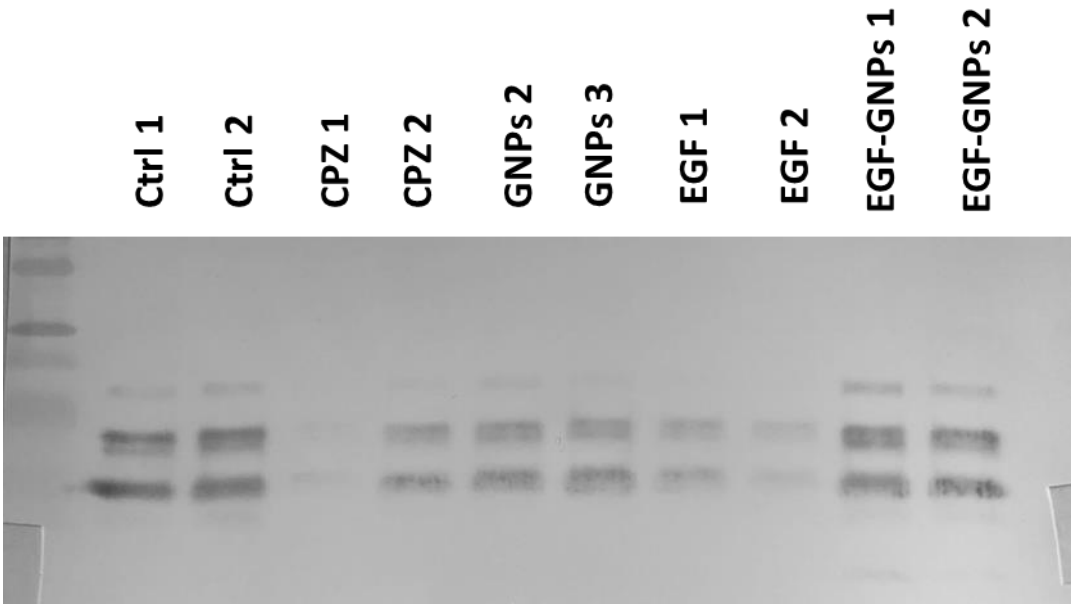

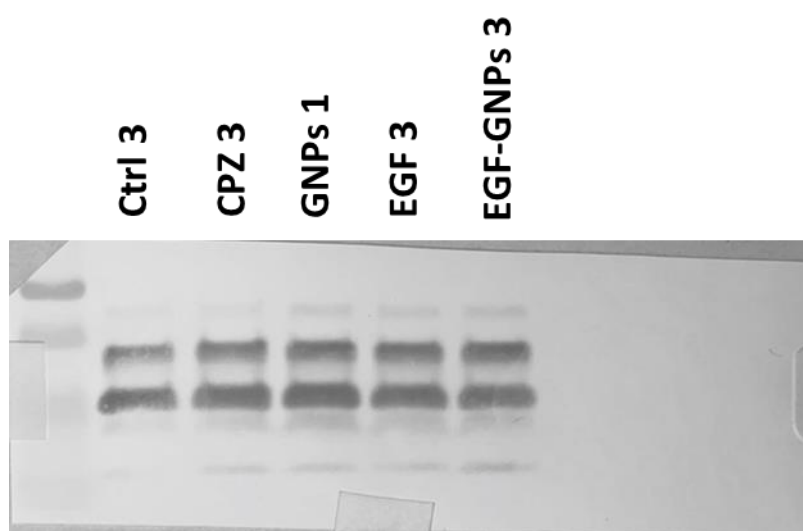

MOG

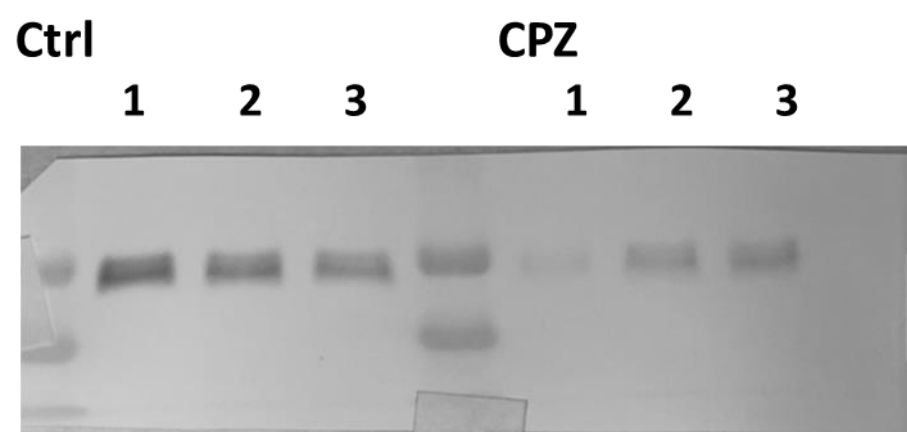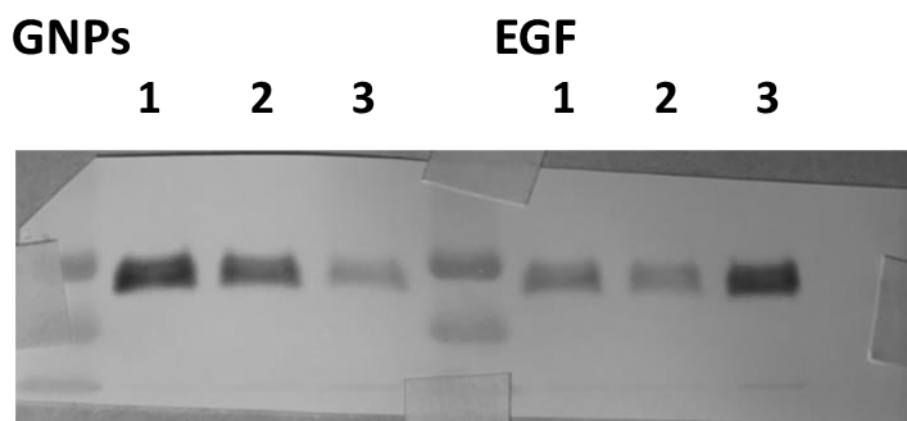

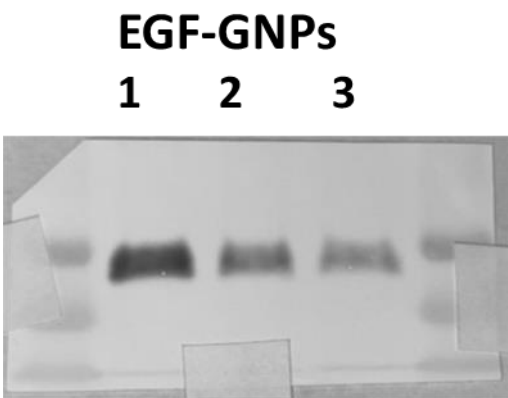

MOG: duplicates used as representative images in the main text

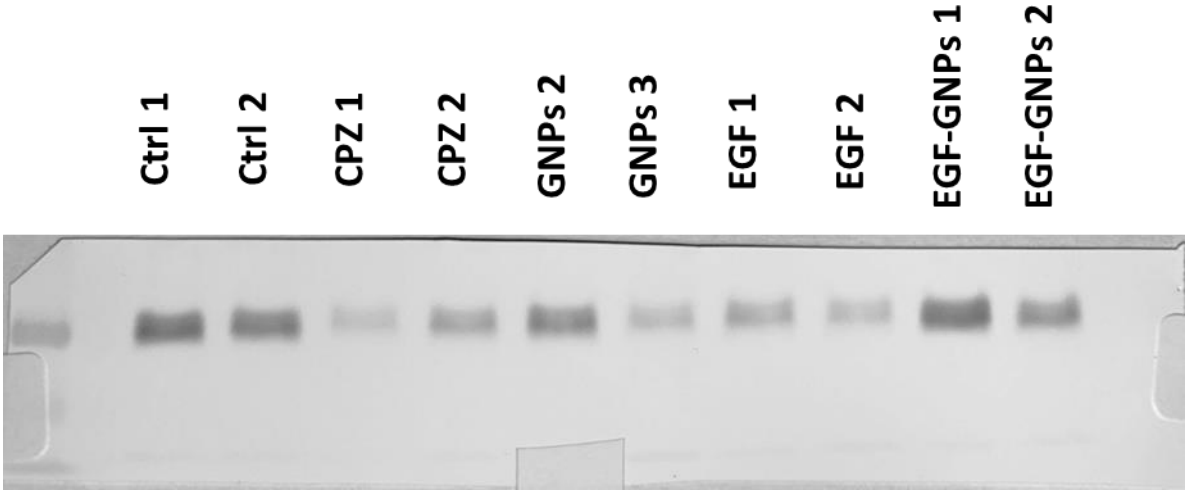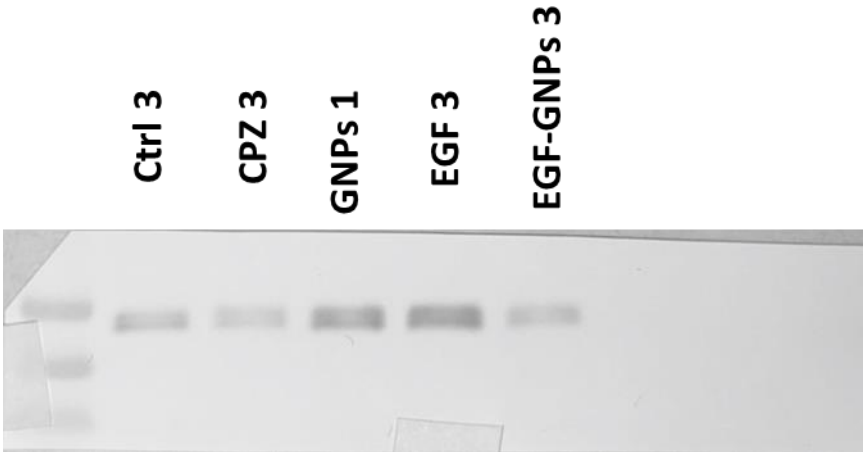

CNPase



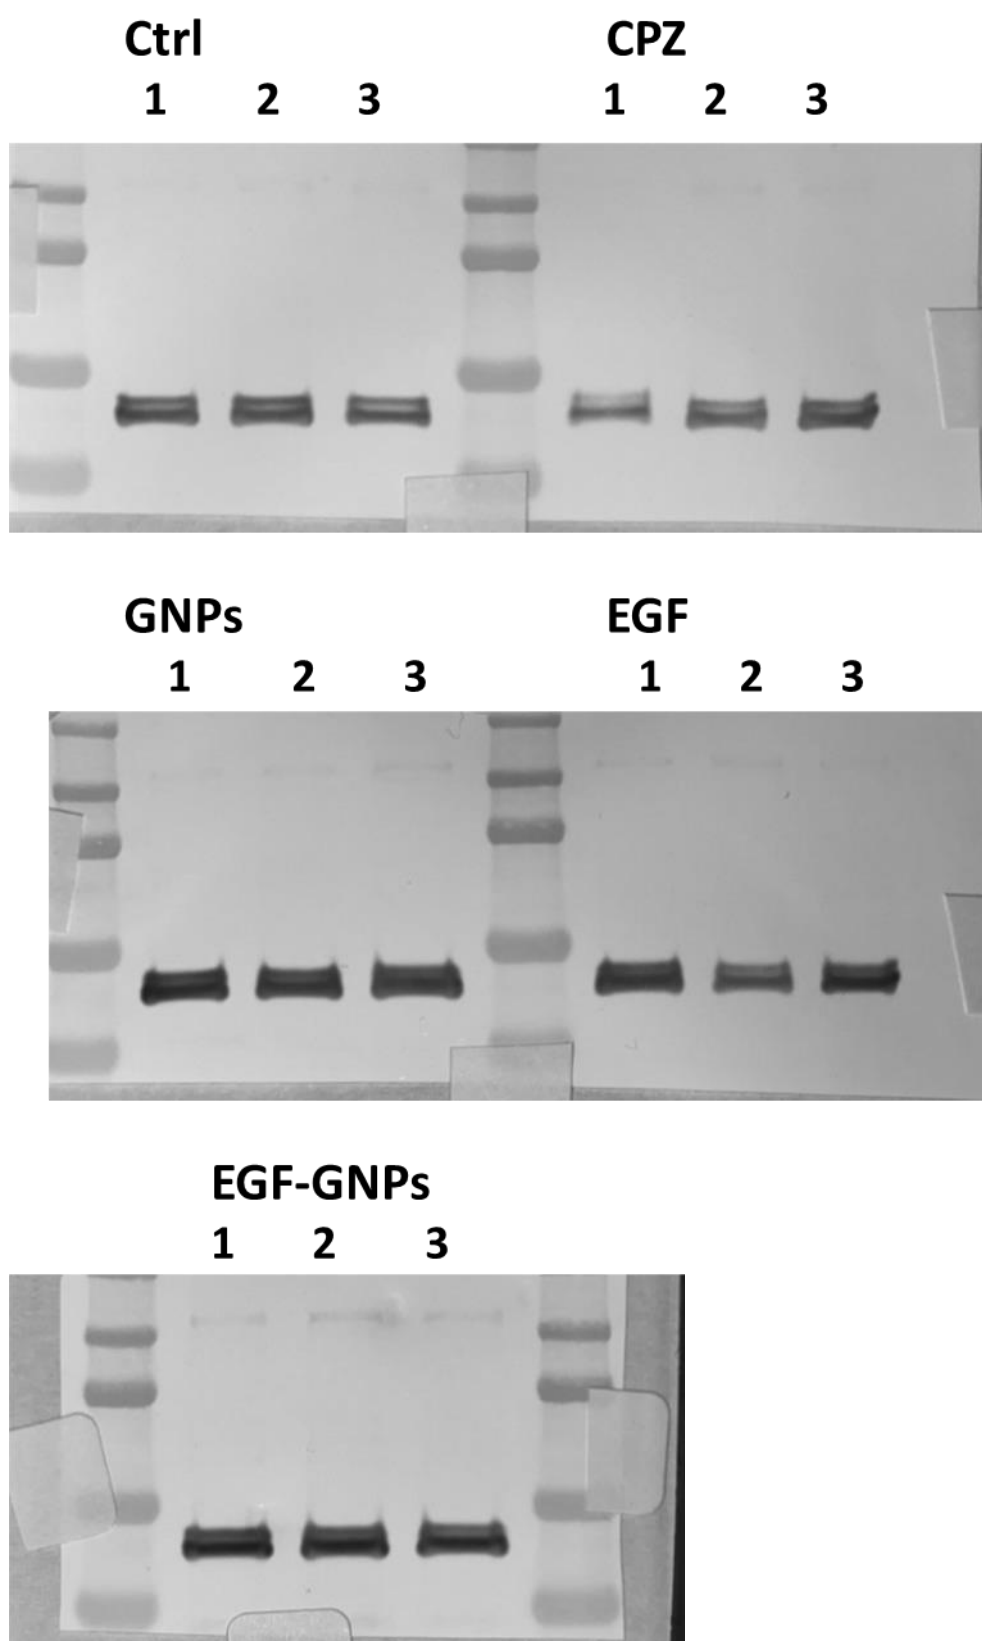

CNPase: duplicates used as representative images in the main text

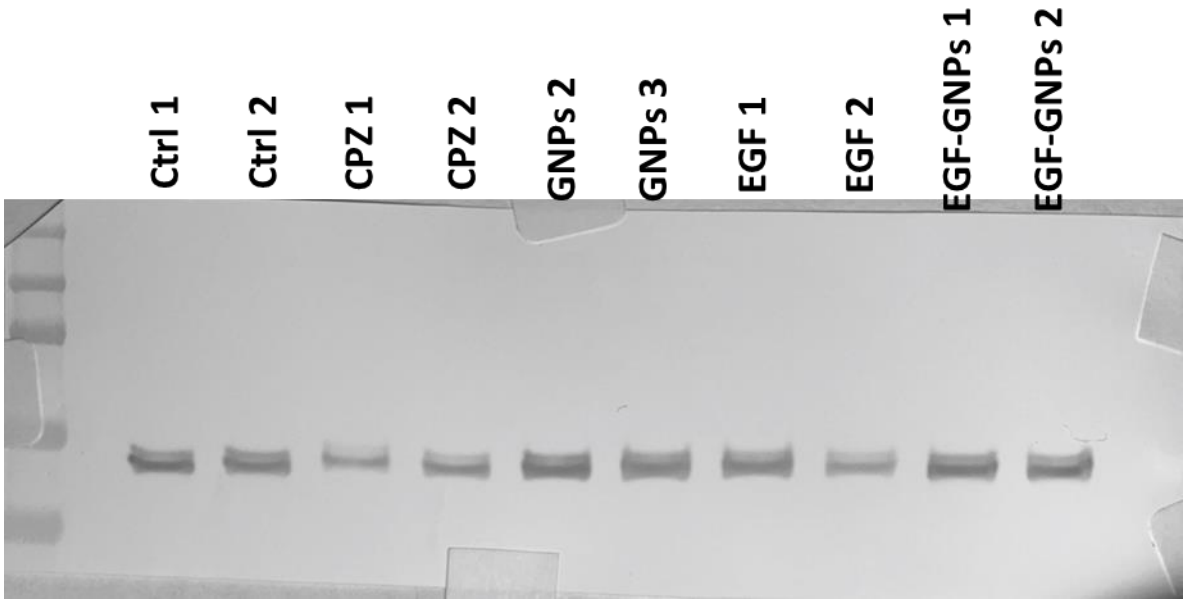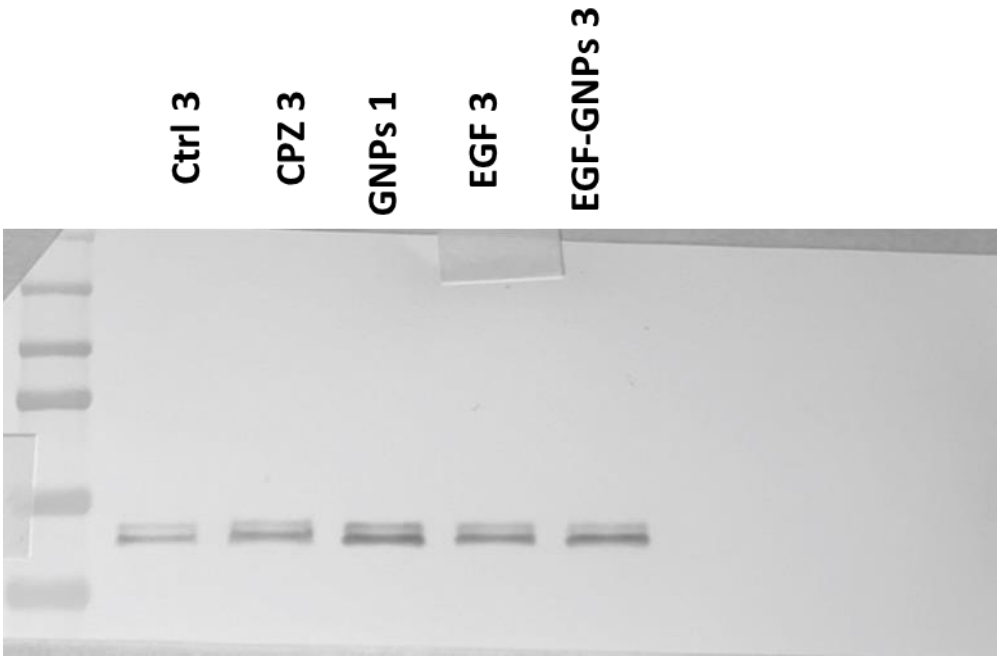

MAG

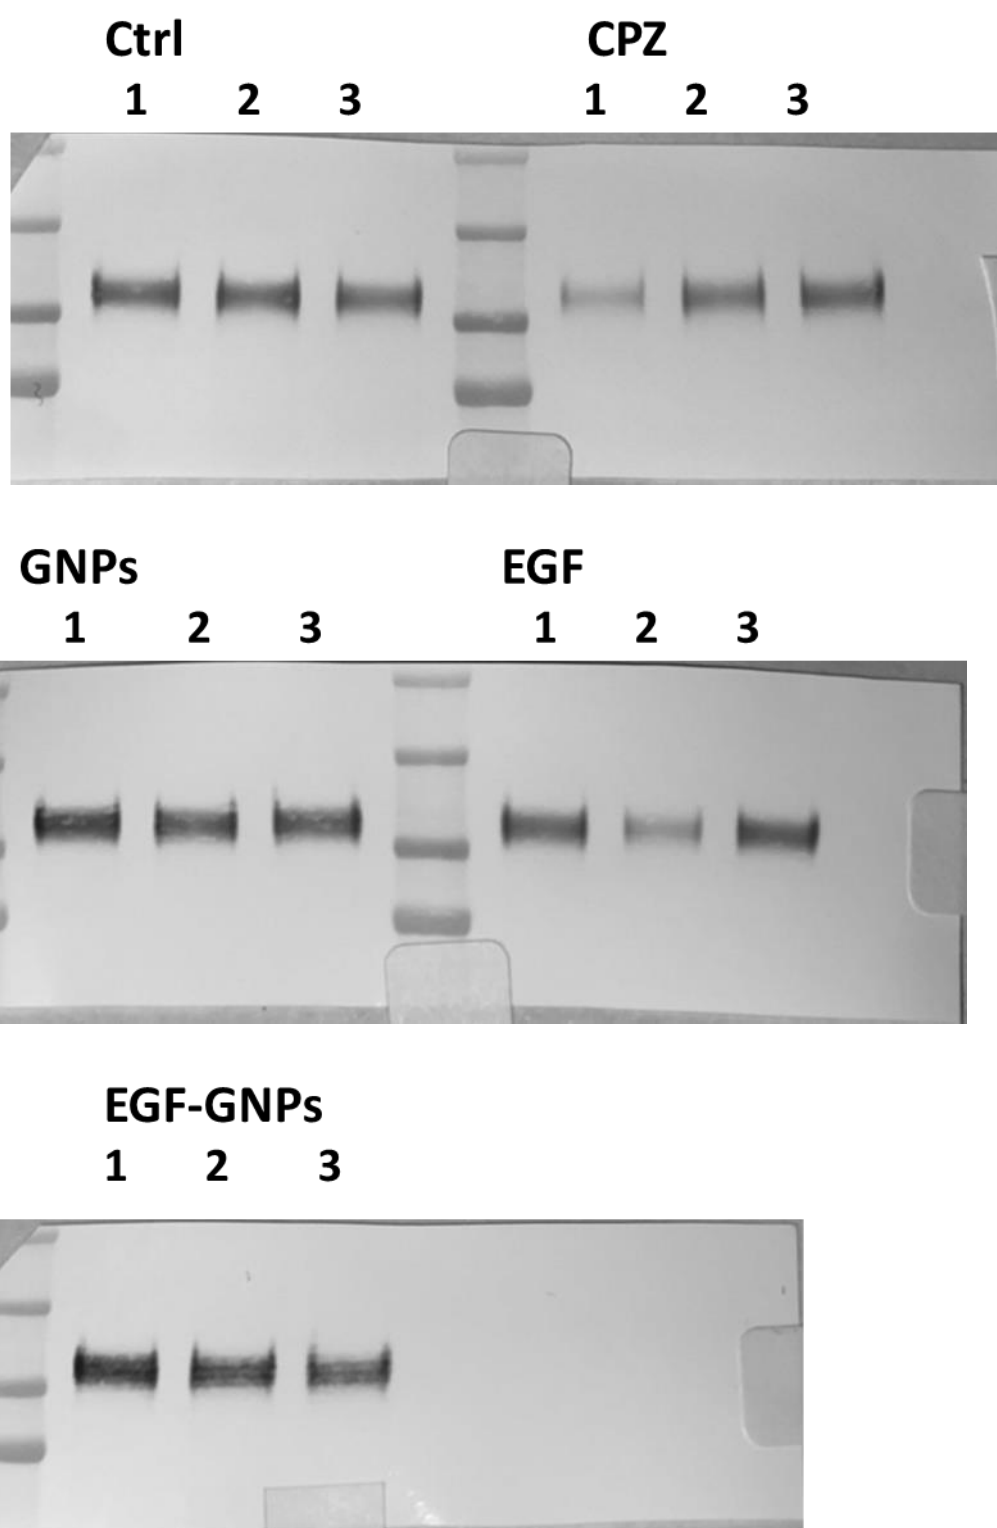

MAG: duplicates used as representative images in the main text

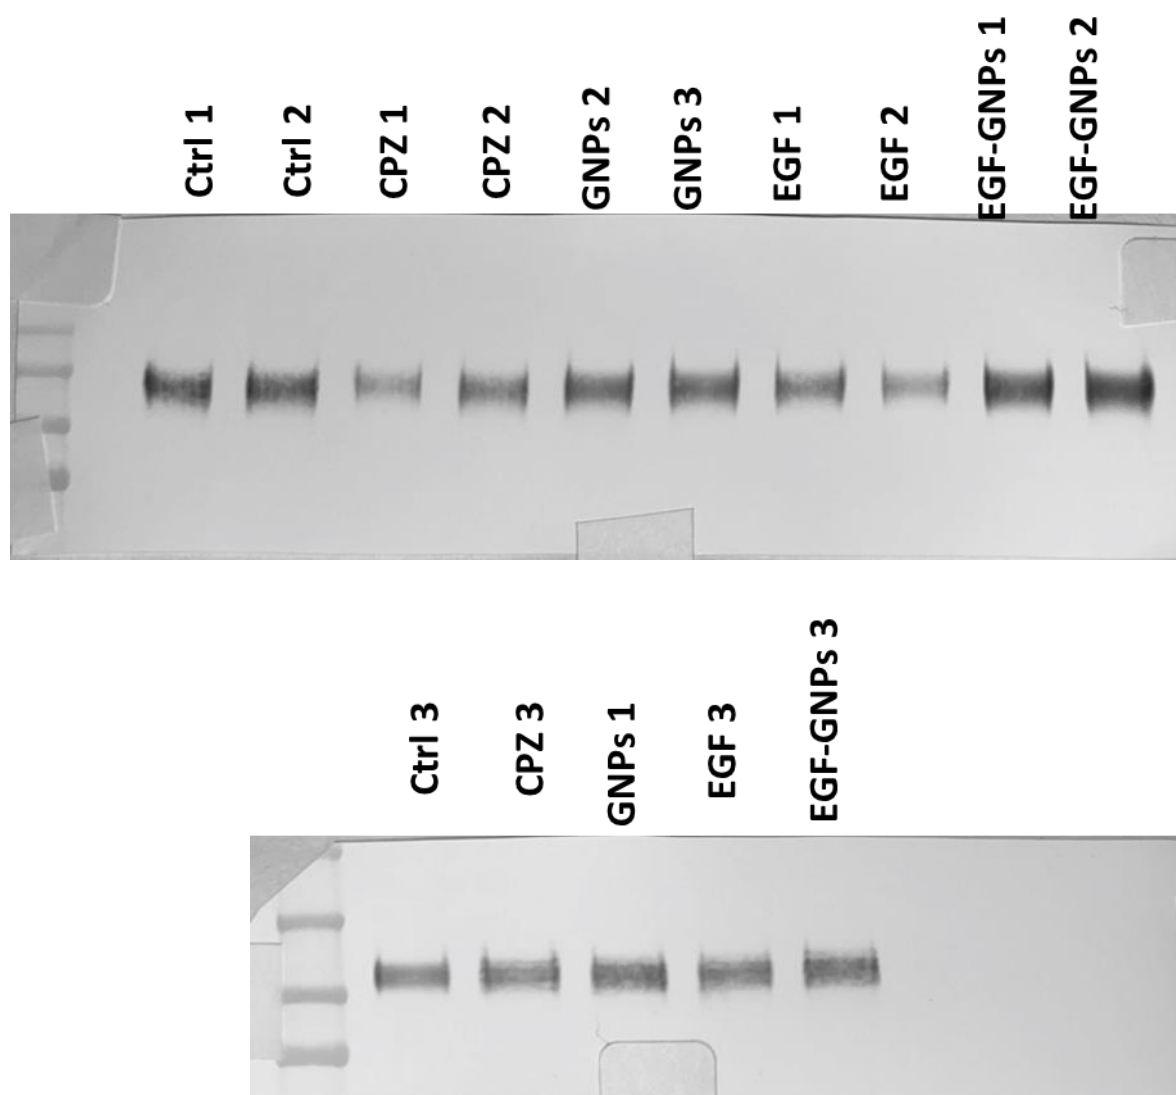

**Figure S1.** Blots obtained at 2 weeks of recovery. Every subject for each group was assigned with a number from 1 to 3. The duplicates were organized in a different arrangement, we used the numbers to identify each animal in every blot.

Act-B

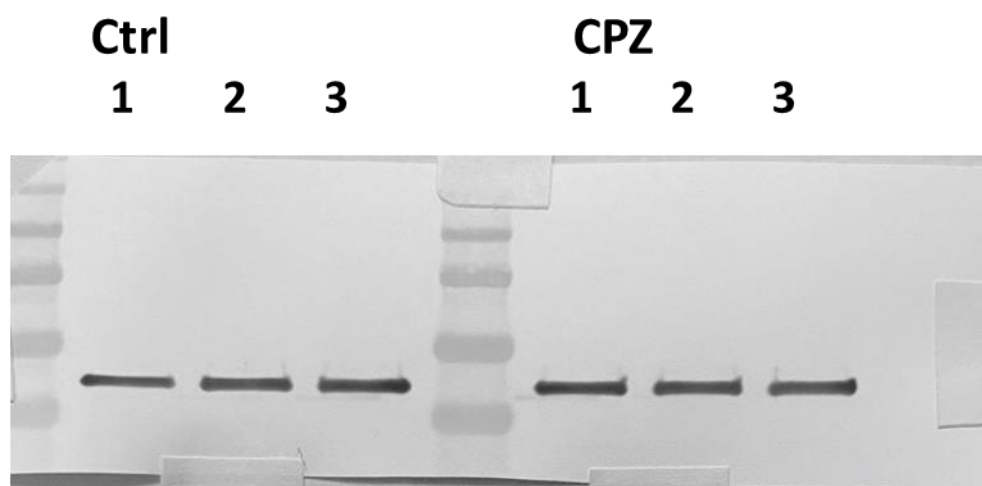

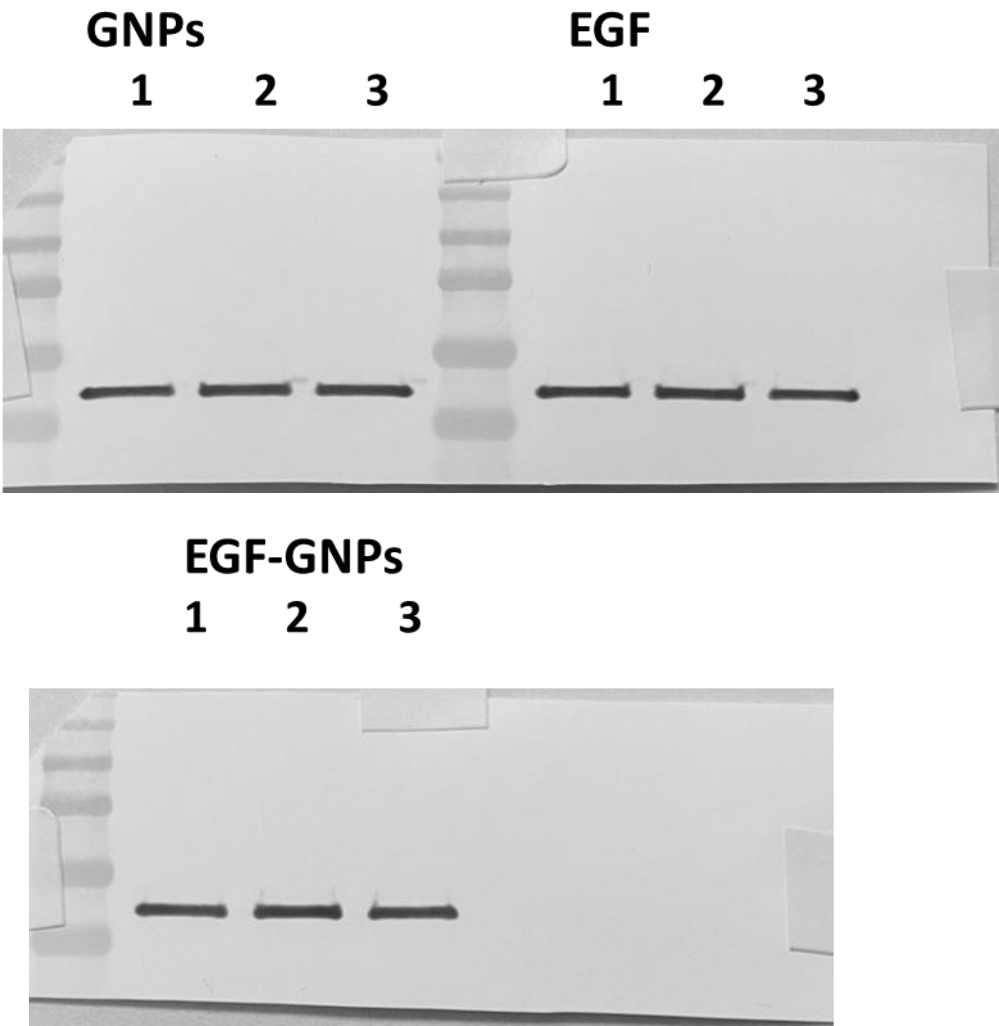

Act-B: duplicates used as representative images in the main text.

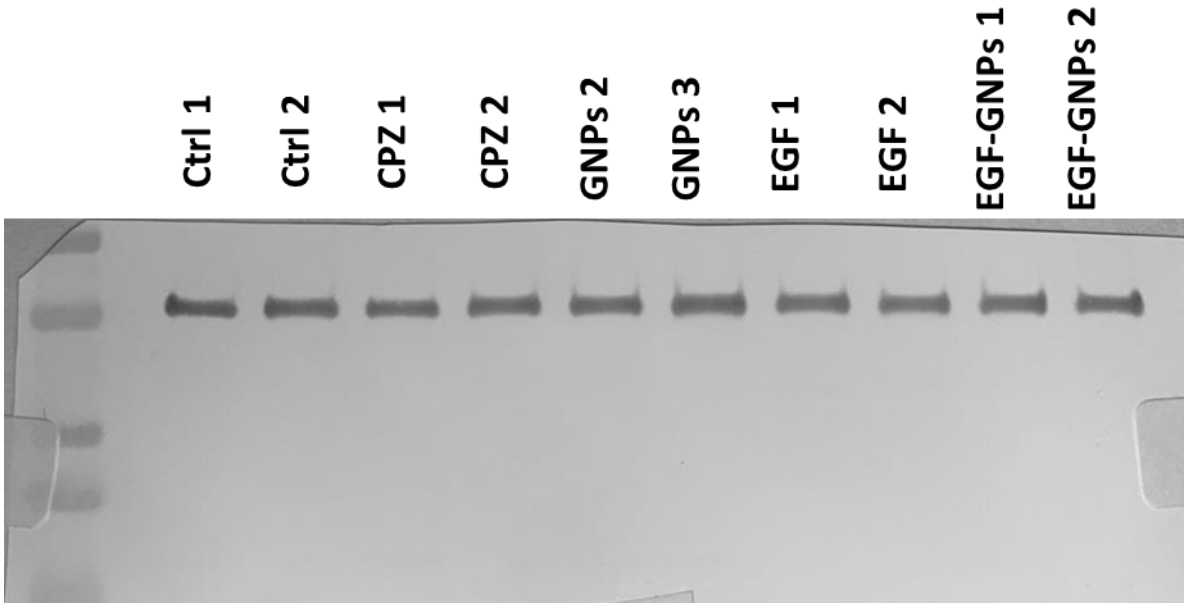

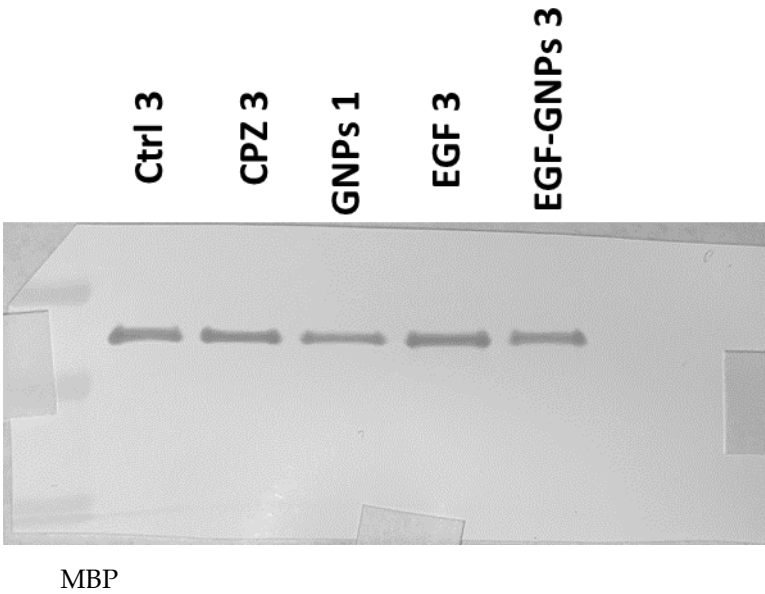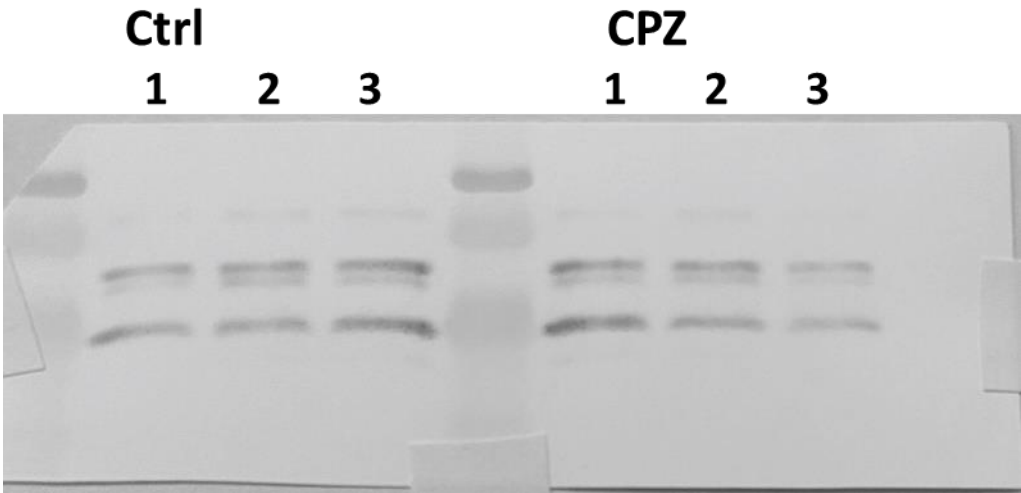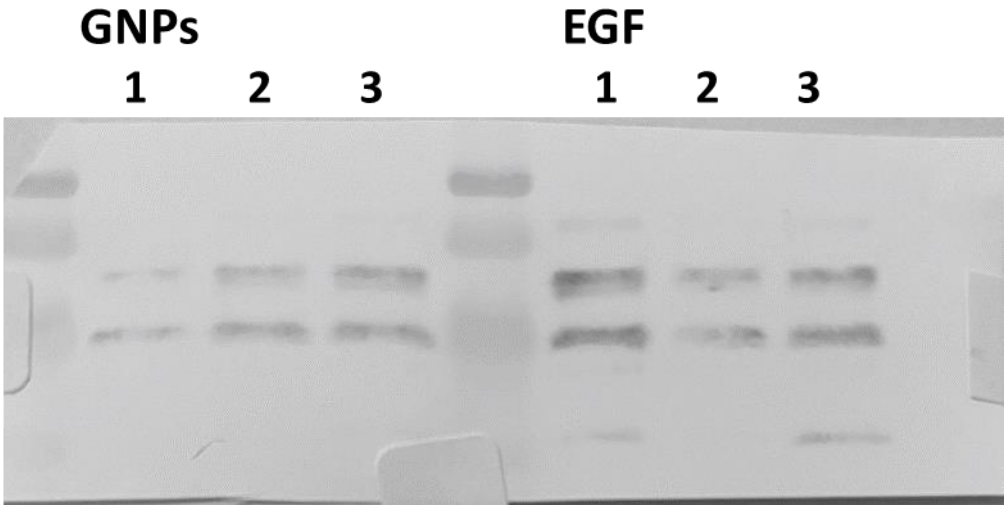

**EGF-GNPs**  
**1     2     3**

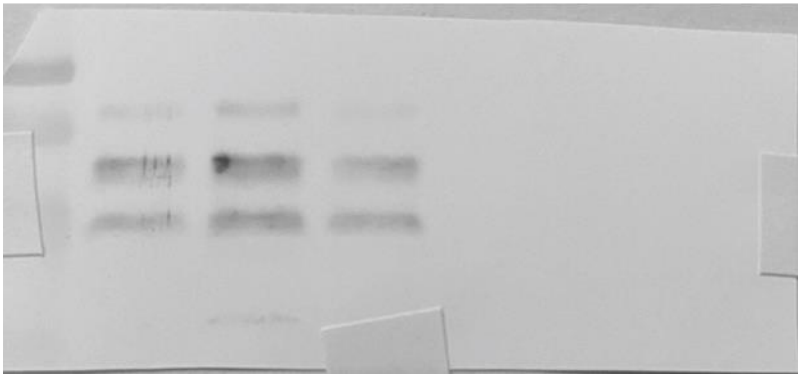

MBP: duplicates used as representative images in the main text

**Ctrl 1     Ctrl 2     CPZ 1     CPZ 2     GNPs 2     GNPs 3     EGF 1     EGF 2     EGF-GNPs 1     EGF-GNPs 2**

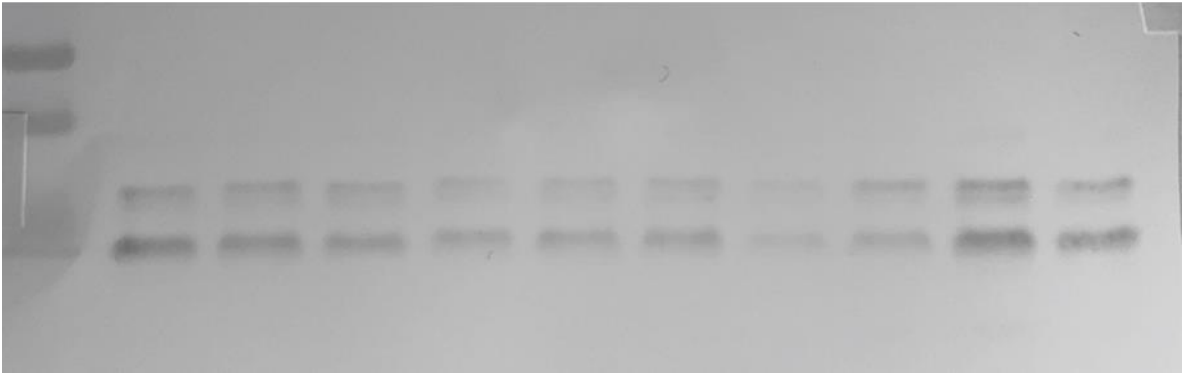

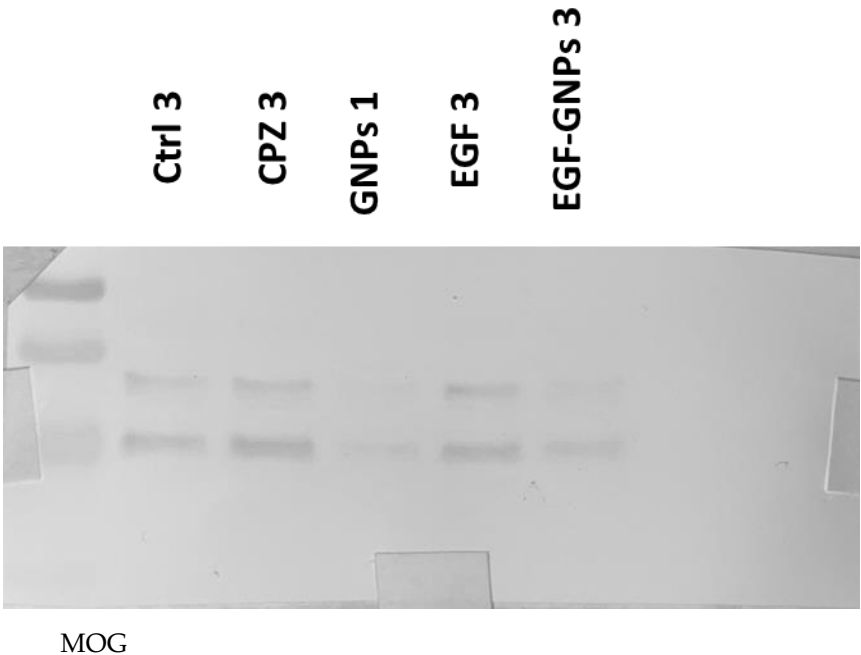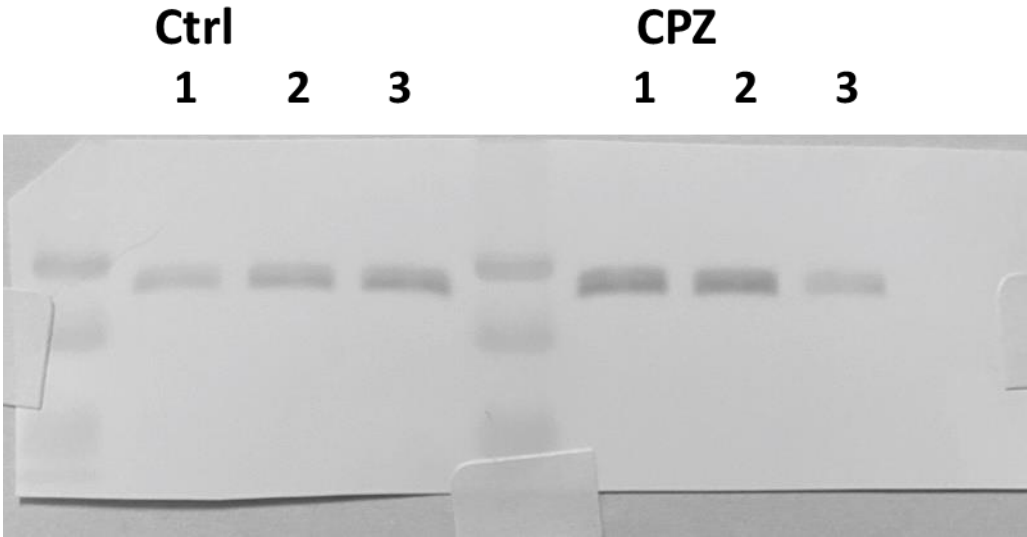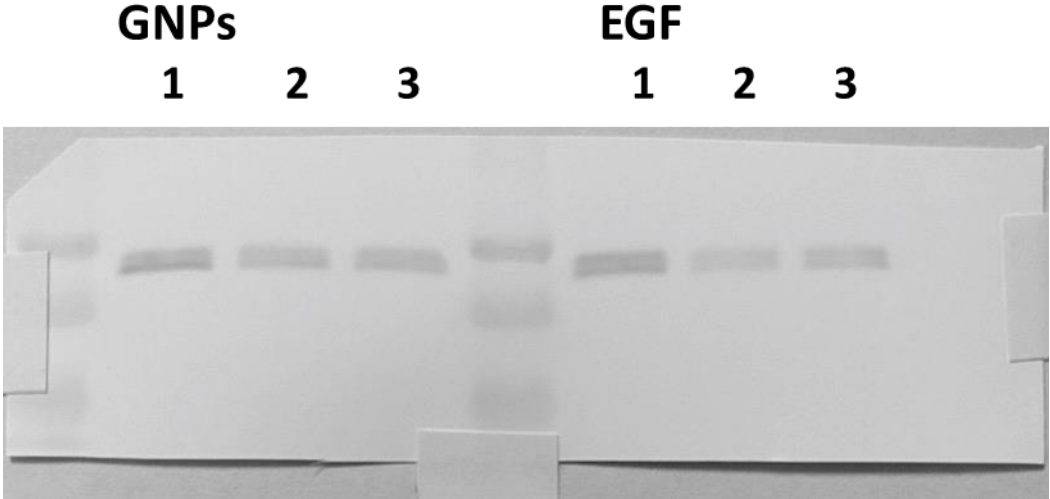



**EGF-GNPs**  
**1      2      3**

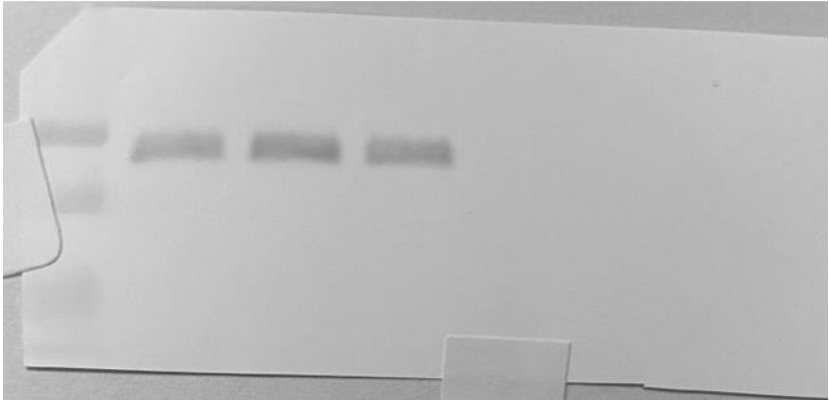

MOG: duplicates used as representative images in the main text

**Ctrl 1      Ctrl 2      CPZ 1      CPZ 2      GNPs 2      GNPs 3      EGF 1      EGF 2      EGF-GNPs 1      EGF-GNPs 2**

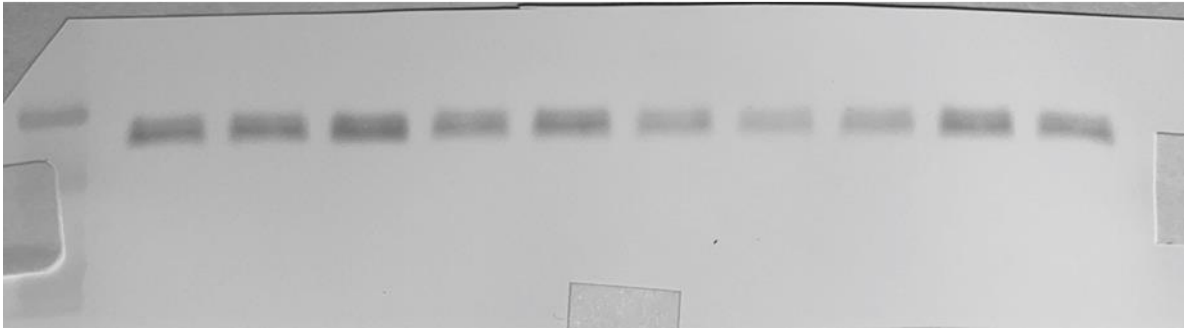

**Ctrl 3      CPZ 3      GNPs 1      EGF 3      EGF-GNPs 3**

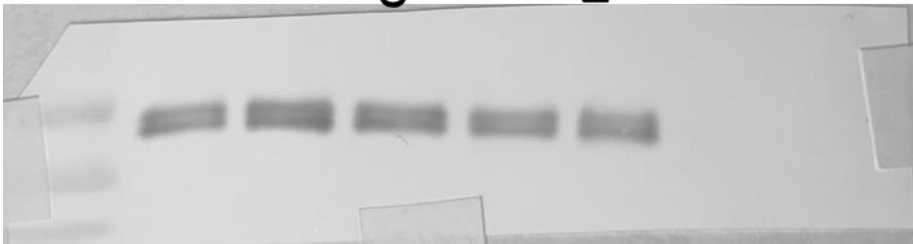

CNPase

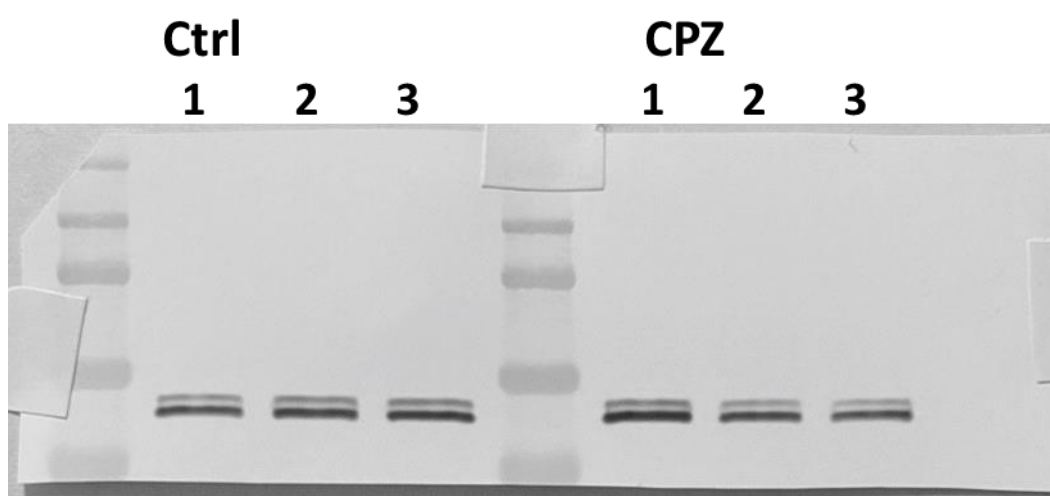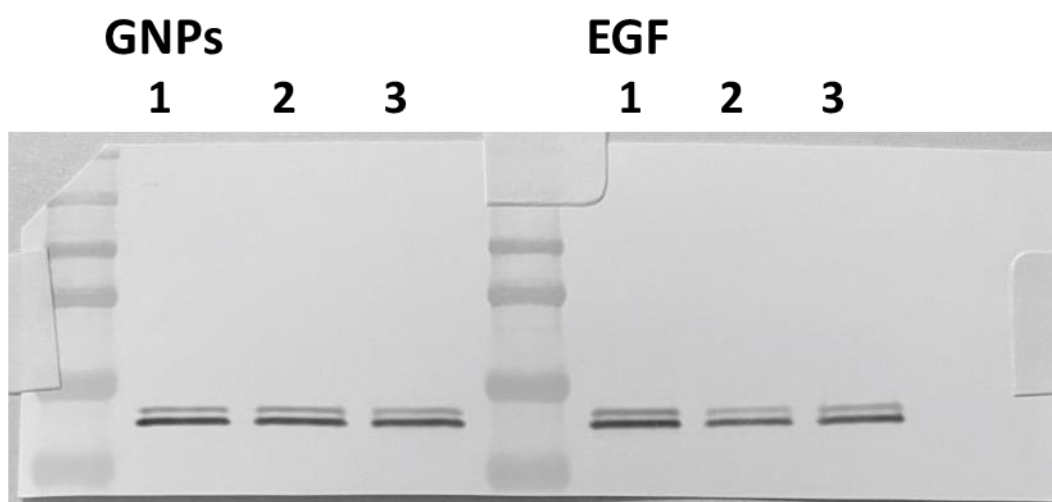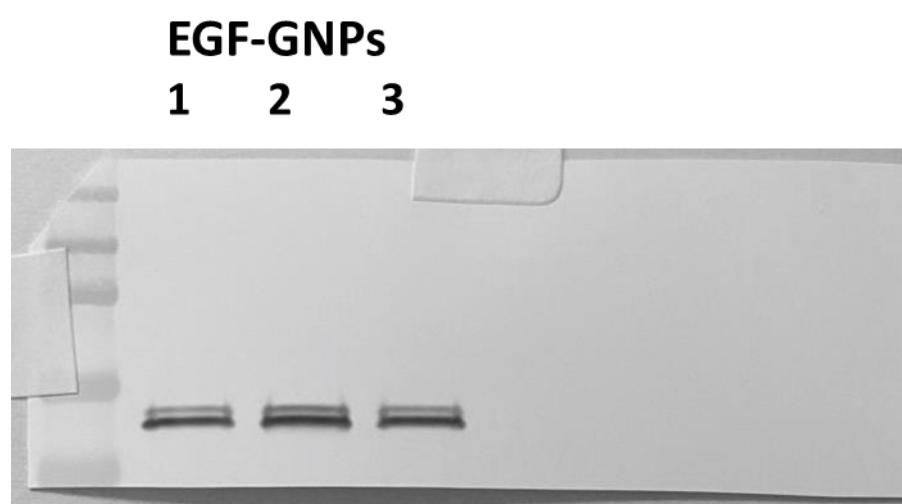

CNPase: duplicates used as representative images in the main text

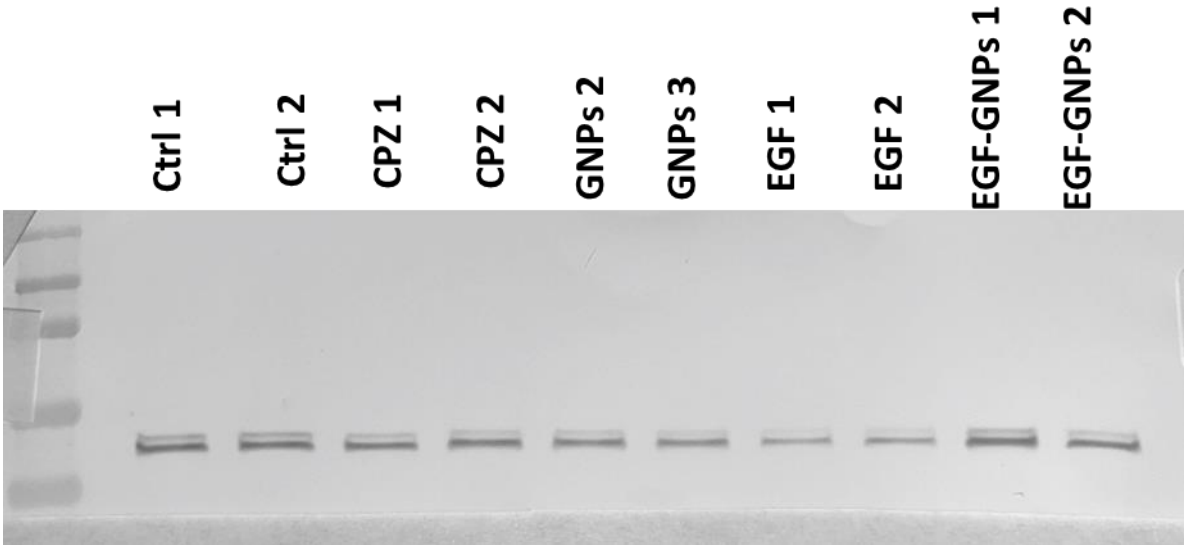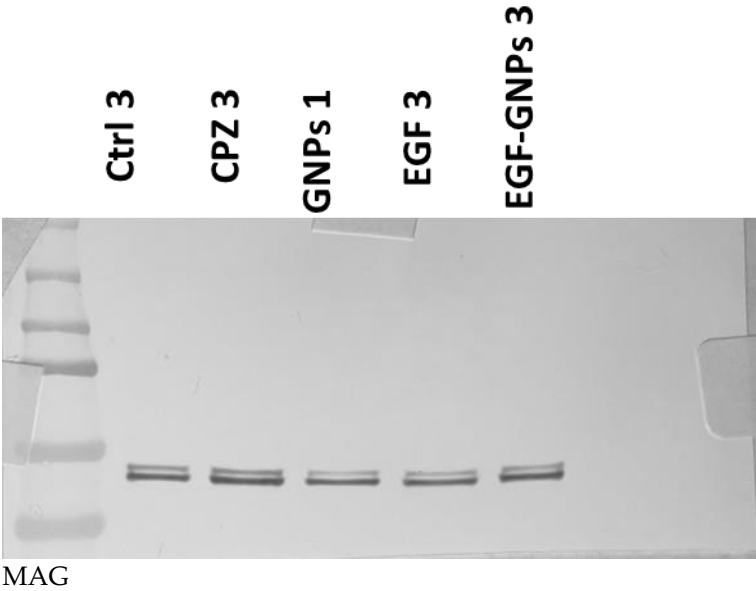

MAG

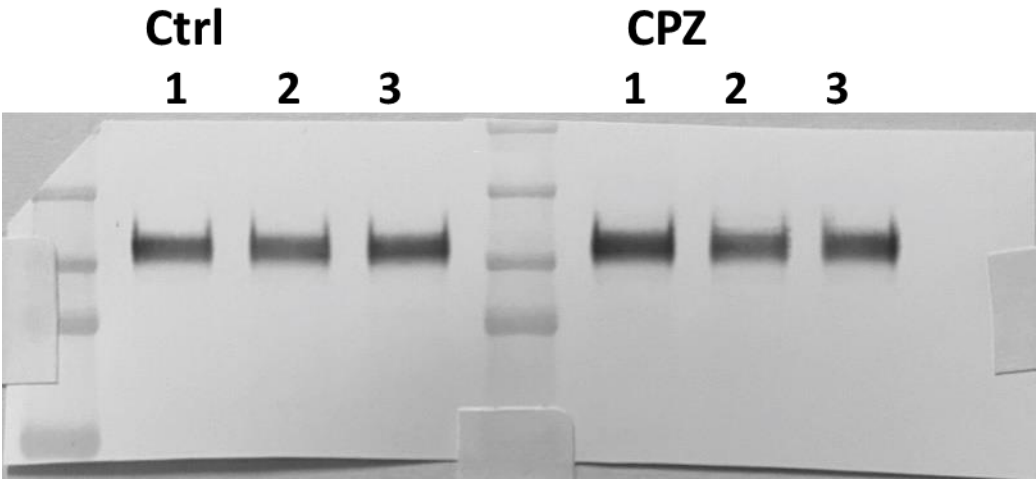

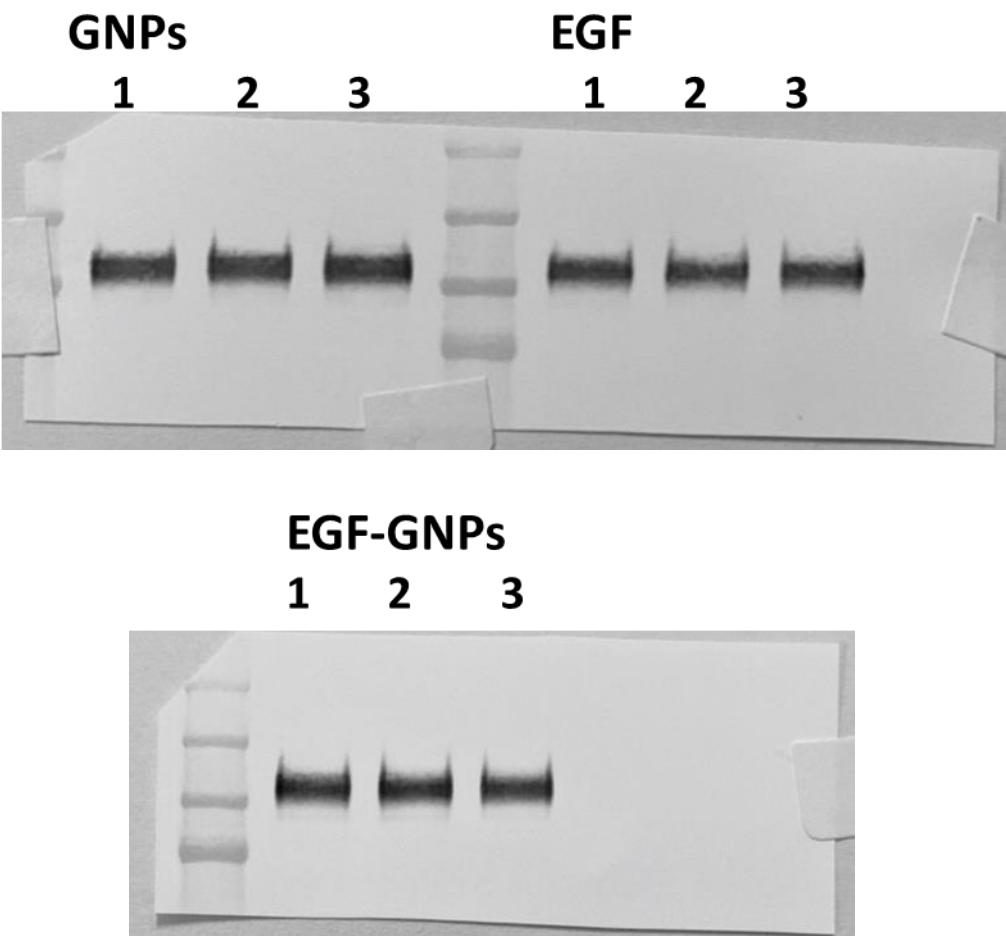

MAG: duplicates used as representative images in the main text

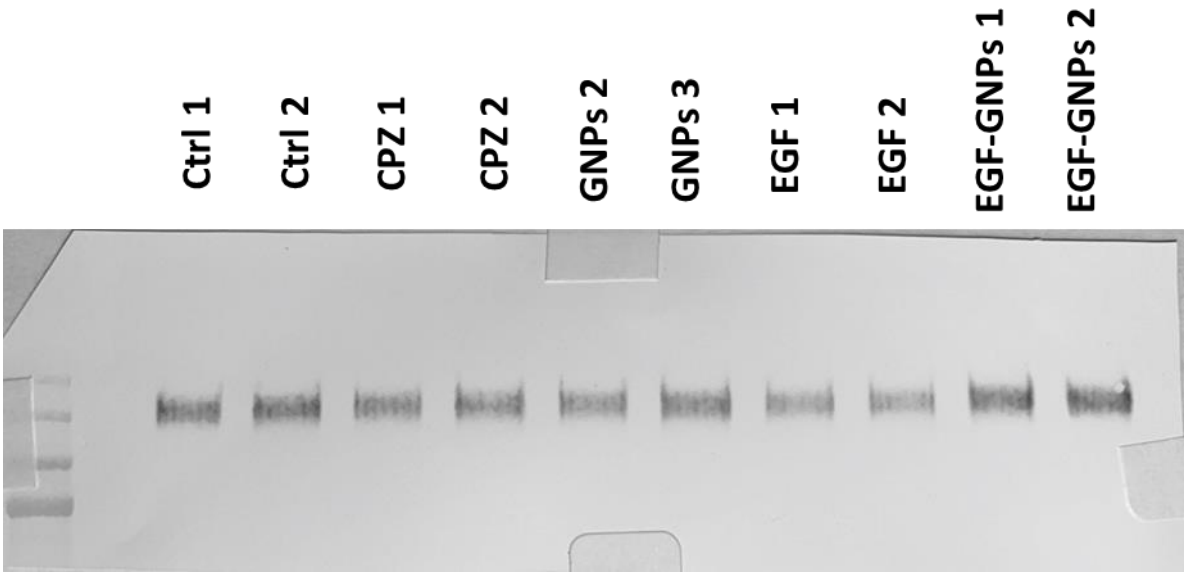

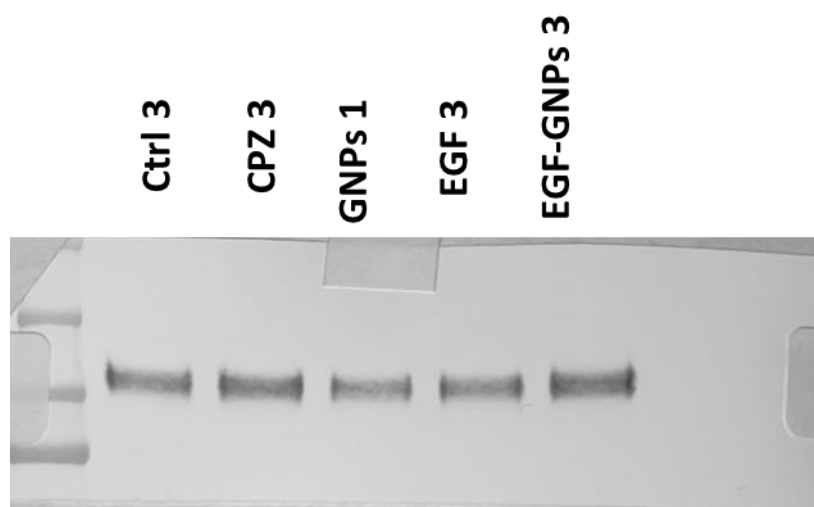

**Figure S2.** Blots obtained at 3 weeks of recovery.
